# Supplementary material for: A randomized, controlled study to evaluate the efficacy of intra-articular, autologous adipose tissue injections for the treatment of mild-to-moderate knee osteoarthritis compared to hyaluronic acid: a study protocol
Source: Springer Nature journal article supplement (doi:10.1186/s12891-018-2300-7), 2018-10-24
Supplement: MOESM1 [file 16222724]

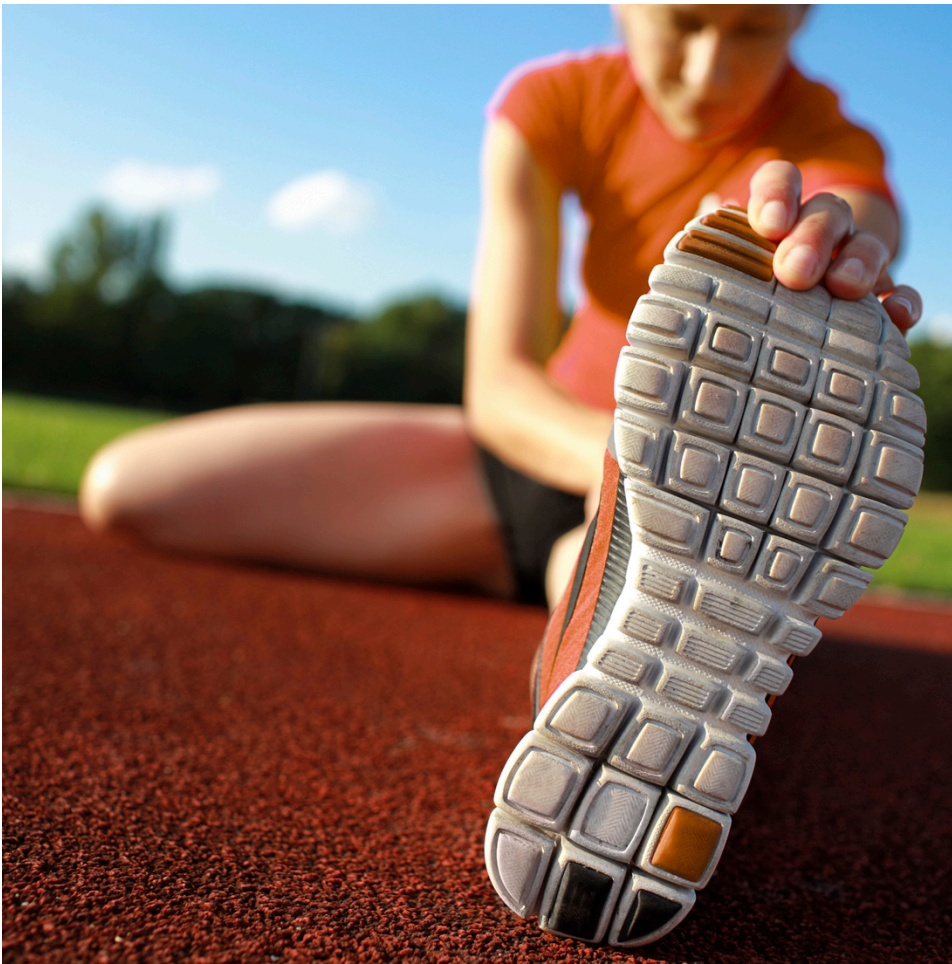

## ADIPOSE TISSUE INJECTIONS FOR OSTEOARTHRITIS

### A randomized, controlled trial at Keck of USC

Non-operative treatment options for patients with osteoarthritis (OA) are limited. Adipose tissue (or fat) injections are currently offered at many clinics across the country. These treatments are often marketed as “stem cell” or regenerative treatments with wide-ranging benefits. However, very few studies have been conducted. This 6-month study will evaluate the efficacy of adipose tissue injections for patients with mild-to-moderate knee OA compared to hyaluronic acid.

Keck School of Medicine of **USC**  
Department of Orthopaedic Surgery

NOW ENROLLING  
PATIENTS BETWEEN  
THE AGES OF 45  
AND 75 WITH MILD-  
TO-MODERATE KNEE  
OSTEOARTHRITIS

TREATMENT AND  
FOLLOW-UP VISITS  
PROVIDED AT NO  
COST

NO SURGERY  
REQUIRED

FOR MORE  
INFORMATION,  
PLEASE CALL  
323-442-6959

C. THOMAS VANGSNESS JR., MD  
[www.VangsnessMD.com](http://www.VangsnessMD.com)

IRB #: HS-17-00365

Version: 26 APR 2018

NCT # 03242707
